# Supplementary material for: Synergistic effect of cross-linked carbon nanosheet frameworks and Sb on the enhancement of sodium storage performances
Source: Royal Society of Chemistry journal article supplement (doi:10.1039/c7nj02105d), 2017-01-01
Supplement: c7nj02105d1.pdf [file c7nj02105d1.pdf]

Electronic Supplementary Material (ESI) for New Journal of Chemistry  
This journal is © The Royal Society of Chemistry

## **Electronic Supplementary Information for**

# **Synergistic Effect of Cross-linked Carbon Nanosheet Frameworks and Sb on Enhancing the Sodium Storage Performances**

**Hongshuai Hou,<sup>a, b</sup> Guoqiang Zou,<sup>b</sup> Peng Ge,<sup>b</sup> Weifeng Wei,<sup>a</sup> Ganggagn Zhao,<sup>b</sup> Xiaobo Ji,<sup>a, b\*</sup> and Lanping Huang<sup>a\*</sup>**

*<sup>a</sup>State Key Laboratory of Powder Metallurgy, Central South University, Changsha, 410083, China*

*<sup>b</sup>College of Chemistry and Chemical Engineering, Central South University, Changsha, 410083, China*

*Corresponding author: Xiaobo Ji, email: xji@csu.edu.cn; Lanping Huang, email: christie@csu.edu.cn*

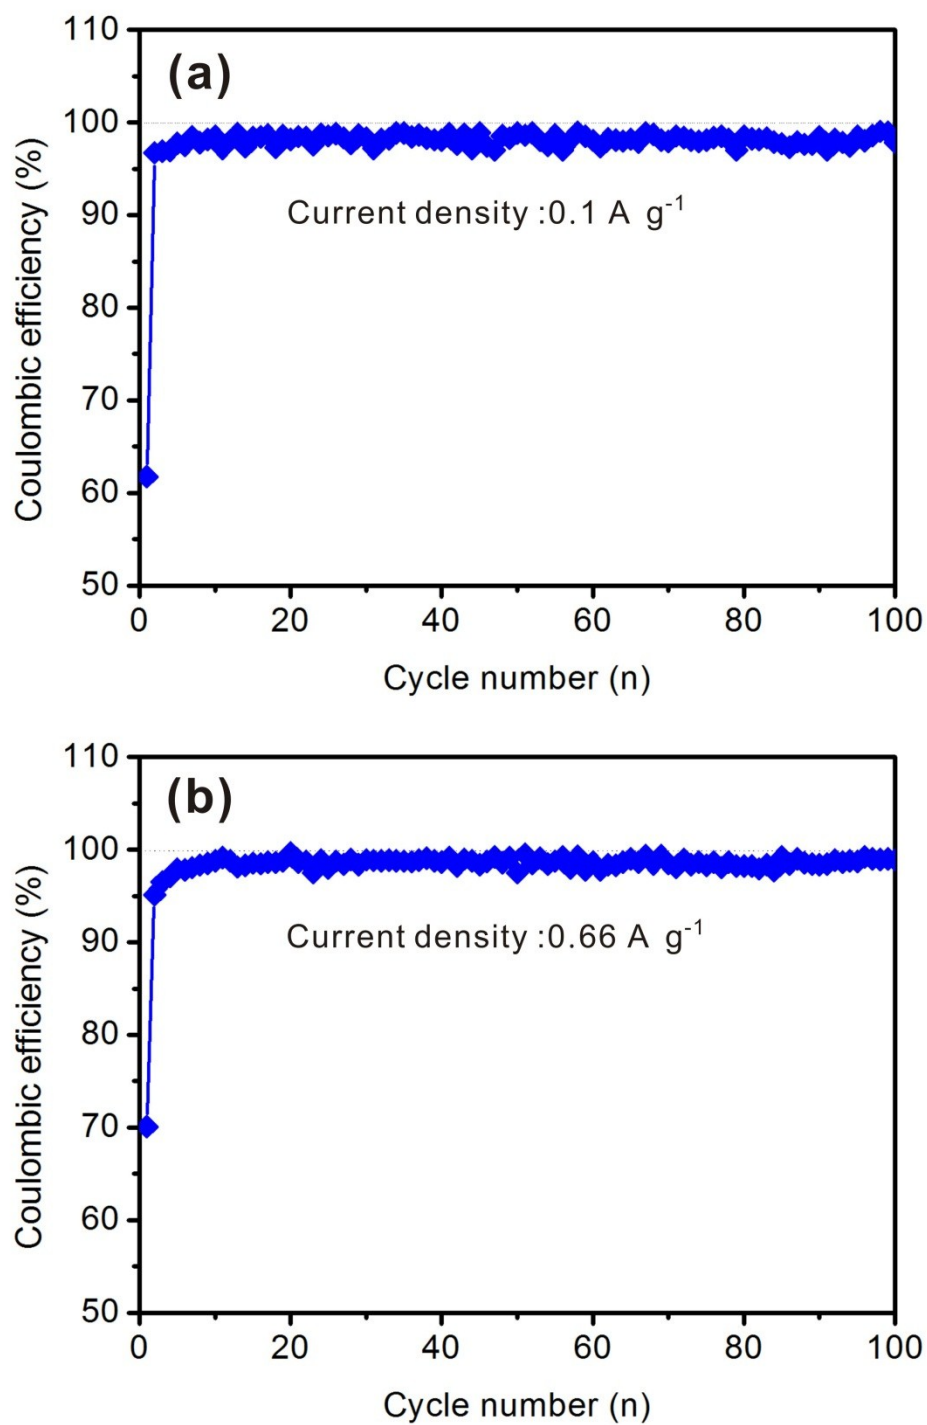

**Figure S1.** Coulombic efficiencies of the Sb/CCNFs composite at 0.1 A g<sup>-1</sup> (a) and 0.66 A g<sup>-1</sup> at different cycles.
